# Supplementary material
Source: PubMed Central journal article supplement (PMC9250939)
Supplement: NIHMS1805223-supplement-Supp.pdf [file NIHMS1805223-supplement-Supp.pdf]

Rice, C.E., Carpenter, L.A., Morrier, M.J. *et al.* Defining in Detail and Evaluating Reliability of *DSM-5* Criteria for Autism Spectrum Disorder (ASD) Among Children. *J Autism Dev Disord* (2022). <https://doi.org/10.1007/s10803-021-05377-y>

## **Supplementary Appendix (SA)**

SA. Figure 1. Criterion Level Mapping *DSM-IV-TR* Autistic Disorder to *DSM-5* Autism Spectrum Disorder Diagnostic Criteria

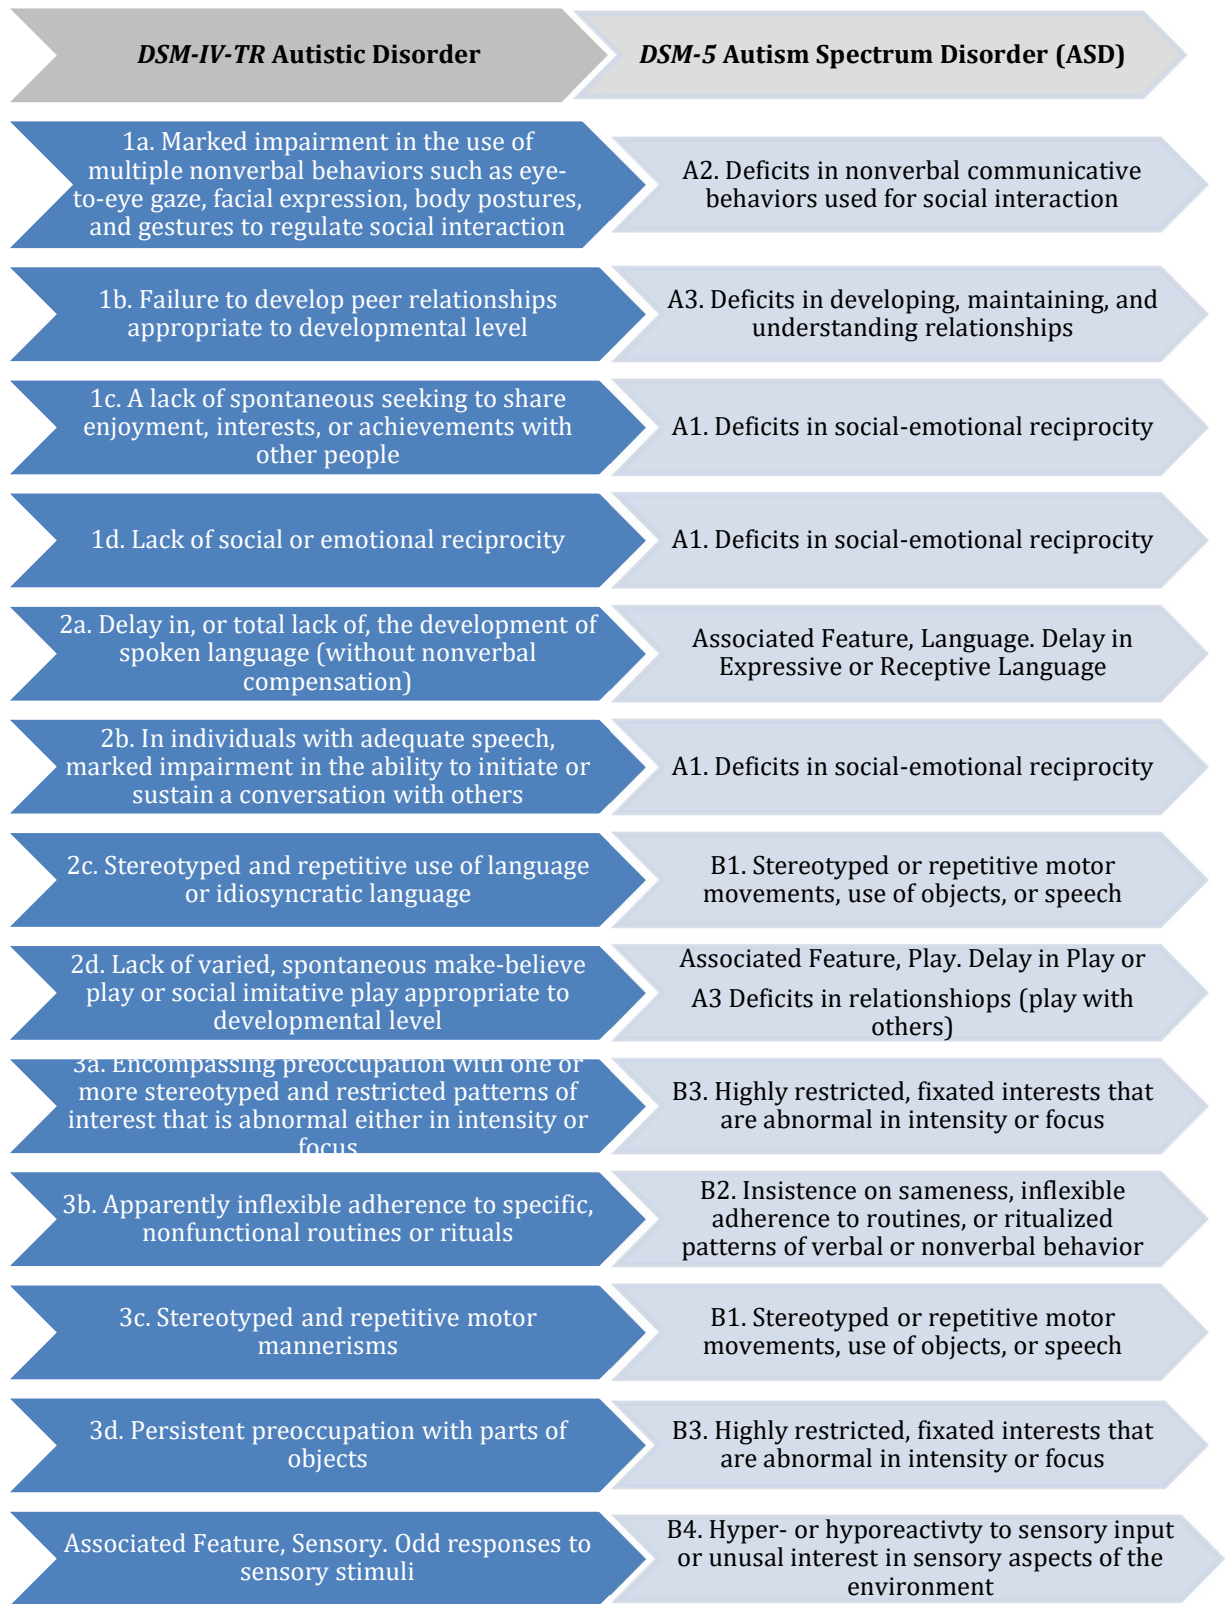

Rice, C.E., Carpenter, L.A., Morrier, M.J. *et al.* Defining in Detail and Evaluating Reliability of *DSM-5* Criteria for Autism Spectrum Disorder (ASD) Among Children. *J Autism Dev Disord* (2022). <https://doi.org/10.1007/s10803-021-05377-y>

SA. Table 1. Extract of *DSM-5* Criteria, Exemplars, and Associated Features from the Autism and Developmental Disabilities Monitoring (ADDM) Network Clinician Review Manual for Surveillance Year 2016.

[See separate document]
